# Supplementary material for: Medicago truncatula ABCG10 is a transporter of 4-coumarate and liquiritigenin in the medicarpin biosynthetic pathway
Source: PubMed Central journal article supplement (PMC5853973; doi:10.1093/jxb/erx059), 2017-03-28
Supplement: erx059_suppl_supplementary_tables_s1-s2.pdf [file erx059_suppl_supplementary_tables_s1-s2.pdf]

## Supplementary Tables

**Table S1.** List of primers used in this study

### A. Primers for Real-Time PCR/ddPCR analyses

| Genes            | Forward primers                | Reverse primers                |
|------------------|--------------------------------|--------------------------------|
| <i>MtPAL1</i>    | 5'- TTGATGACCCTTGTATGGAC -3'   | 5'- CTTGATTTTGTTAGGACTTGC -3'  |
| <i>MtPAL2</i>    | 5'- ATAGATGACAGAGAAGAAATCG -3' | 5'- GGAATTTTCAGAATTTCCCTTC -3' |
| <i>MtPAL3</i>    | 5'- TGGTGTCAATGGTGAGTTGC -3'   | 5'- CCACCTCTTTAGGCAAAAGGG -3'  |
| <i>MtPAL4</i>    | 5'- CTAAGAGAACACTCACAACC -3'   | 5'- ACTTCCTTTGGCAAGATAGC -3'   |
| <i>MtPAL5</i>    | 5'- TCCTCTTCTTGAATGCTTGG -3'   | 5'- CACTAAAAATTCCGGCAAAC -3'   |
| <i>MtPAL6</i>    | 5'- TCCTCTTCTTGAATGCTTGG -3'   | 5'- GGACACACATTAGCAATACC -3'   |
| <i>MtIFS1</i>    | 5'- AGTACCTGGTCAACATGGAG -3'   | 5'- ACAAAGTAGGAGAGACAAGC -3'   |
| <i>MtIFS2</i>    | 5'- GGTGAAGAGAAAATGCACCG -3'   | 5'- TGAAACATCACTCATGGACC -3'   |
| <i>MtIFS3</i>    | 5'- ATCCAGTGCTTTGATCTGC -3'    | 5'- CAACCATTGCAACATTTTGTG -3'  |
| <i>MtABCG10</i>  | 5'- AACTACTGTTATGTCGACCG -3'   | 5'- CAACAGCGAAAATAAAGGCA -3'   |
| <i>Mtβ-Actin</i> | 5'- TTCTCTCAGTACTTCCAGC -3'    | 5'- AAGCATCACAATCACTCC -3'     |

### B. EcoRI (atgaattc)/BamHI (taggatcc)/HindIII (actaagctt) tagged primers for promoters activity analyses - GUS (gene specific sequences underlined)

| Genes           | Forward primers                                    | Reverse primers                                     |
|-----------------|----------------------------------------------------|-----------------------------------------------------|
| <i>MtPAL4</i>   | 5'- atgaattc <u>CTAAATAAACTTCAATTATACGCACC</u> -3' | 5'- taggatcc <u>AATTACGAATGCACGAATATTTTACC</u> -3'  |
| <i>MtPAL5</i>   | 5'- atgaattc <u>ACATTGGTATATCTTGTTTAGTC</u> -3'    | 5'- taggatcc <u>ATCTTAATTGATAATAATTAATGTTCC</u> -3' |
| <i>MtPAL6</i>   | 5'- atgaattc <u>GG ATG TTG GTA ACA TGA G</u> -3'   | 5'- taggatcc <u>GATCTTATATTGATACTAATAG</u> -3'      |
| <i>MtIFS1</i>   | 5'- atgaattc <u>AATGTGTAGTATTCTCATGG</u> -3'       | 5'- actaagctt <u>GGTGTATAGCTTCTTTGTAG</u> -3'       |
| <i>MtIFS3</i>   | 5'- atgaattc <u>GAGAAATGATATTTGTACATC</u> -3'      | 5'- taggatcc <u>GGTGTATTGTAGTATATTTAC</u> -3'       |
| <i>MtABCG10</i> | 5'- atgaattc <u>GTGTCCTTGATTAACCTCACC</u> -3'      | 5'- taggatcc <u>TTTTTGTGCTGTTGTGAAAC</u> -3'        |

**C. LIC\_F adapter (tagttggaatgggttcgaa)/ LIC\_R adapter (ttatggagttgggttcgaa) tagged primers for promoters activity analyses - NLS:GFP (gene specific sequences underlined)**

| <b>Genes</b>    | <b>Forward primers</b>                                        | <b>Reverse primers</b>                                         |
|-----------------|---------------------------------------------------------------|----------------------------------------------------------------|
| <i>MtPAL4</i>   | 5'- tagttggaatgggttcgaa <u>CTAAATAAACTTCAATTATACGCACC</u> -3' | 5'- ttatggagttgggttcgaa <u>AATTACGAATGCACGAATATTTTACC</u> -3'  |
| <i>MtPAL5</i>   | 5'- tagttggaatgggttcgaa <u>ACATTGGTATATCTTGTTTAGTC</u> -3'    | 5'- ttatggagttgggttcgaa <u>ATCTTAATTGATAATAATTAATGTTCC</u> -3' |
| <i>MtPAL6</i>   | 5'- tagttggaatgggttcgaa <u>GG ATG TTG GTA ACA TGA G</u> -3'   | 5'- ttatggagttgggttcgaa <u>GATCTTATATTGATACTAATAG</u> -3'      |
| <i>MtIFS1</i>   | 5'- tagttggaatgggttcgaa <u>AATGTGTAGTATTCTCATGG</u> -3'       | 5'- ttatggagttgggttcgaa <u>GGTGTATAGCTTCTTTGTAG</u> -3'        |
| <i>MtIFS3</i>   | 5'- tagttggaatgggttcgaa <u>GAGAAATGATATTTGTACATC</u> -3'      | 5'- ttatggagttgggttcgaa <u>GGTGTATTGTAGTATATTTAC</u> -3'       |
| <i>MtABCG10</i> | 5'- tagttggaatgggttcgaa <u>GTGTCCTTGATTAACCTCACC</u> -3'      | 5'- ttatggagttgggttcgaa <u>TTTTTGTGCTGTTGTGAAAC</u> -3'        |

**D. Primers used for cloning of MtABCG10 genomic/cDNA hybrid; AscI (ggcggcc)/ PacI (ctacttaattaa) tagged primers (gene specific sequences underlined)**

| <b>DNA fragment</b> | <b>Forward primers</b>                          | <b>Reverse primers</b>                               |
|---------------------|-------------------------------------------------|------------------------------------------------------|
| genomic part        | 5'- ATGGAGGGAACAGATATATACAG -3'                 | 5'- GGGTCAGGCTTGATATTTGC -3'                         |
| cDNA part           | 5'- ATGCTATCCGAGCTTTCTAG -3'                    | 5'- CTATCTCTTTTGGAAAGTTAAAGG -3'                     |
| hybrid              | 5'- ggcggcc <u>AATGGAGGGAACAGATATATACAG</u> -3' | 5'- ctacttaattaa <u>CTATCTCTTTTGGAAAGTTAAAGG</u> -3' |

**Table S2.** GenBank accession numbers for the *Medicago truncatula* sequences used in this study

**PAL ( L-phenylalanine ammonia - lyase)**

| Gene name     | Loci         | mRNA         | Protein      |
|---------------|--------------|--------------|--------------|
| <i>MtPAL1</i> | MTR_2g094960 | XM_013609864 | XP_013465318 |
| <i>MtPAL2</i> | MTR_5g098720 | XM_003618028 | XP_003618076 |
| <i>MtPAL3</i> | MTR_1g094780 | XM_003591829 | XP_003591877 |
| <i>MtPAL4</i> | MTR_1g064090 | XM_003590423 | XP_003590471 |
| <i>MtPAL5</i> | MTR_7g101395 | XM_013594536 | XP_013449990 |
| <i>MtPAL6</i> | MTR_7g101425 | XM_013594537 | XP_013449991 |

**IFS (isoflavone synthase)**

| Gene name     | Loci         | mRNA         | Protein      |
|---------------|--------------|--------------|--------------|
| <i>MtIFS1</i> | MTR_4g088195 | XM_013601477 | XP_013456931 |
| <i>MtIFS2</i> | MTR_4g088170 | XM_013601474 | XP_013456928 |
| <i>MtIFS3</i> | MTR_4g088160 | XM_013601473 | XP_013456927 |

**Others**

| Gene name        | Loci         | mRNA         | Protein      |
|------------------|--------------|--------------|--------------|
| <i>MtABCG10</i>  | MTR_2g102670 | XM_003597771 | XP_003597819 |
| <i>Mtβ-Actin</i> | MTR_3g095530 | XM_003602497 | XP_003602545 |
